# Supplementary material for: Accuracy Assessment and Impact Factor Analysis of GEDI Leaf Area Index Product in Temperate Forest
Source: MDPI journal article supplement (doi:10.3390/rs15061535), 2023-03-10
Supplement: s1 [file s1]

**Table S1.** The NEON AOP discrete LiDAR sites and their features. The ID, Pd, Sangle, Ele, MAP, and MAT represent the climate domain, point density (point/m<sup>2</sup>), scan angle, elevation, mean annual precipitation and mean annual temperature, respectively.

| Site                                                    | ID  | Date   | Pd | Sangle (°) | Areas (km <sup>2</sup> ) | Ele(m) | MAP (mm) | MAT (°C) | Dominant land cover types                            |
|---------------------------------------------------------|-----|--------|----|------------|--------------------------|--------|----------|----------|------------------------------------------------------|
| Abby Road (ABBY)                                        | D16 | 2019-7 | 16 | ±18        | 74                       | 363    | 2530     | 8.00     | Broadleaf forest                                     |
| Bartlett Experimental Forest (BART)                     | D01 | 2019-8 | 4  | ±36        | 118                      | 232    | 1056     | 8.00     | Forest                                               |
| Blandy Experimental Farm NEON (BLAN)                    | D02 | 2019-6 | 4  | ±18        | 210                      | 183    | 983      | 12.1     | Fragmented secondary forests and successional shrubs |
| Lyndon B. Johnson National Grassland (CLBJ)             | D11 | 2019-5 | 11 | ±32        | 158                      | 272    | 926      | 17.50    | Forest and grassland                                 |
| Dead Lake (DELA)                                        | D08 | 2019-5 | 4  | ±42        | 122                      | 25     | 1372     | 17.60    | Forest and agriculture                               |
| Great Smoky Mountains National Park, Twin Creeks (GRSM) | D07 | 2019-5 | 6  | ±36        | 166                      | 579    | 1396     | 13.00    | Deciduous old-growth forest                          |
| Harvard Forest & Quabbin Watershed NEON (HARV)          | D01 | 2019-7 | 6  | ±18        | 391                      | 348    | 1199     | 7.4      | Deciduous forest                                     |
| Jones Ecological Research Center (JERC)                 | D03 | 2019-9 | 11 | ±18        | 193                      | 44     | 1307     | 19.50    | Forest, grassland, and wetland                       |
| Lenoir Landing (LENO)                                   | D08 | 2019-5 | 4  | ±33        | 115                      | 20     | 1429     | 18.00    | Mixed forest, grassland, and wetlands                |
| Mountain Lake Biological Station (MLBS)                 | D07 | 2018-5 | 15 | ±18        | 166                      | 1126   | 1030     | 13.00    | Deciduous forest                                     |
| Niwot Ridge Mountain Research Station (NIWO)            | D13 | 2019-8 | 14 | ±18        | 152                      | 3513   | 758      | 0.00     | Mixed forest                                         |
| Ordway-Swisher Biological Station (OSBS)                | D03 | 2019-4 | 4  | ±36        | 239                      | 46     | 1302     | 20.90    | Coniferous forest                                    |
| Rocky Mountain National Park, CASTNET(RMNP)             | D10 | 2018-9 | 17 | ±18        | 190                      | 2743   | 520      | 4.00     | Mixed pine forest                                    |
| Smithsonian Environmental                               | D02 | 2019-5 | 8  | ±34        | 245                      | 15     | 1107     | 14.00    | Mixed forest                                         |

| Research Center<br>(SERC)                            |         |        |    |     |     |          |      |       |                                                                                                                                                                |  |
|------------------------------------------------------|---------|--------|----|-----|-----|----------|------|-------|----------------------------------------------------------------------------------------------------------------------------------------------------------------|--|
| Soaproot Saddle<br>(SOAP)                            | D1<br>7 | 2019-6 | 4  | ±36 | 172 | 121<br>0 | 900  | 13.40 | Evergreen<br>Forest,<br>Shrub/Scrub<br>Deciduous<br>Forest, Mixed<br>Forest, Woody<br>Wetlands<br>Deciduous<br>Forest,<br>Evergreen<br>Forest, Mixed<br>Forest |  |
| Steigerwaldt-<br>Chequamegon (STEI/<br>CHEQ)         | D0<br>5 | 2019-6 | 16 | ±18 | 297 | 481      | 782  | 5.00  | Evergreen<br>Forest,<br>Shrub/Scrub<br>Deciduous<br>Forest, Mixed<br>Forest, Woody<br>Wetlands<br>Deciduous<br>Forest,<br>Evergreen<br>Forest, Mixed<br>Forest |  |
| Talladega National<br>Forest (TALL)                  | D0<br>8 | 2019-5 | 5  | ±30 | 136 | 166      | 1383 | 17.20 | Evergreen<br>Forest,<br>Shrub/Scrub<br>Evergreen<br>coniferous<br>forest                                                                                       |  |
| Lower Teakettle<br>(TEAK)                            | D1<br>7 | 2019-6 | 5  | ±30 | 188 | 214<br>7 | 941  | 7.00  | Deciduous<br>forest and<br>mixed forest                                                                                                                        |  |
| University of Kansas<br>Field Station NEON<br>(UKFS) | D0<br>6 | 2019-7 | 10 | ±18 | 204 | 322      | 990  | 12.7  | Evergreen<br>coniferous<br>forest                                                                                                                              |  |
| University of Notre<br>Dame (UNDE)                   | D0<br>5 | 2019-7 | 6  | ±18 | 208 | 521      | 802  | 4.3   | Deciduous<br>forest and<br>mixed forest                                                                                                                        |  |
| Wind River<br>Experimental Forest<br>NEON (WREF)     | D1<br>6 | 2019-8 | 25 | ±18 | 330 | 351      | 2225 | 9.2   | Evergreen<br>coniferous<br>forest                                                                                                                              |  |
| Yellowstone Northern<br>Range (Frog Rock)<br>(YELL)  | D1<br>2 | 2019-7 | 4  | ±28 | 245 | 211<br>6 | 509  | 0.00  | Evergreen<br>Forest,<br>Grassland/Herb<br>aceous,<br>Shrub/Scrub                                                                                               |  |

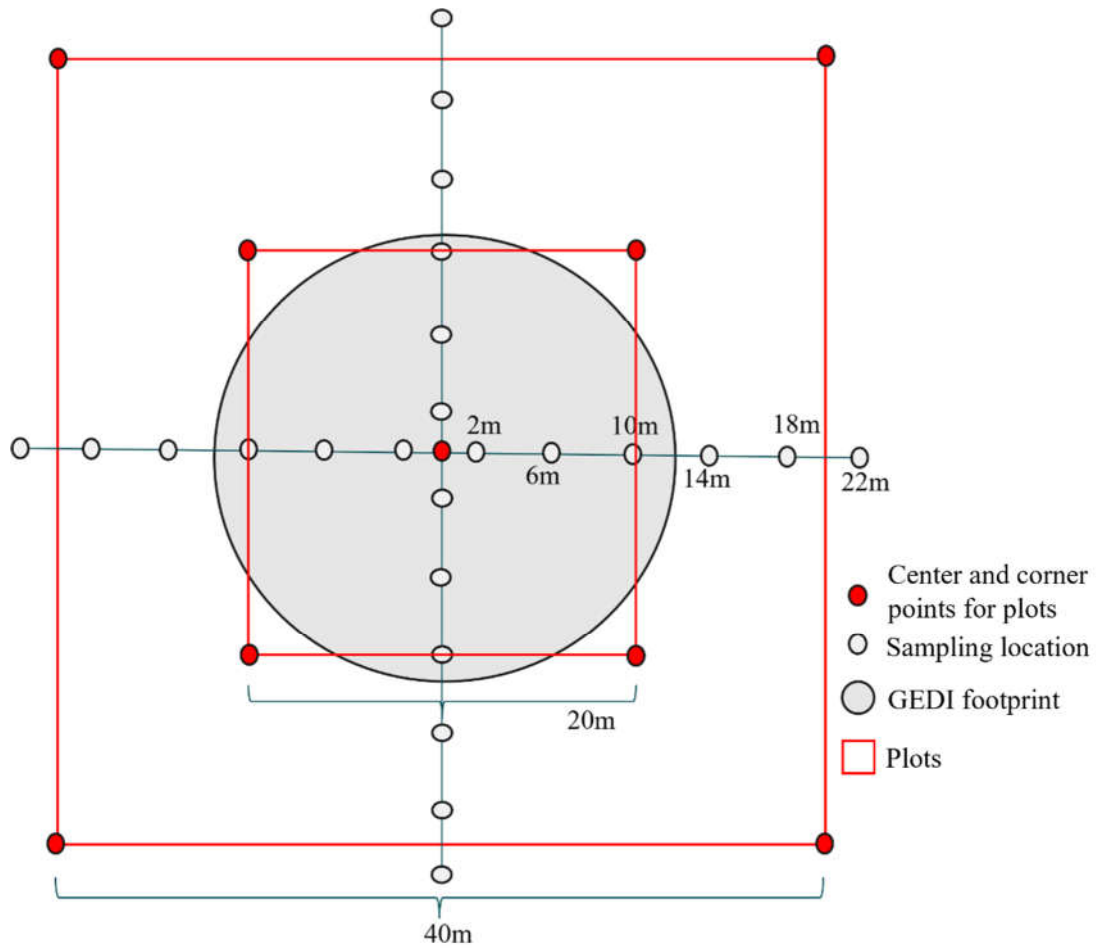

**Figure S1.** Locations for taking DHP imagery within a plot. The locations were marked with a white ellipse. The black circle represented the GEDI footprint, while the red rectangle represented the NEON Lidar plot.

**Table S2.** Field-measured LAI<sub>e</sub> and LAI<sub>t</sub> corresponding to the 22 footprints of GEDI in the Fenghuang Mountains. GEDI shot\_number is the identification of the GEDI footprint. DBH is the diameter of breast height. The units of tree height, DBH, Tree density, LAI<sub>e</sub>, and LAI<sub>t</sub> are m, cm, tress/hm<sup>2</sup>, m<sup>2</sup>/m<sup>2</sup>, and m<sup>2</sup>/m<sup>2</sup>, respectively.

| ID | GEDI shot_number   | Longitude | Latitude  | Tree height | DBH     | Tree density | LAI <sub>e</sub> | LAI <sub>t</sub> |
|----|--------------------|-----------|-----------|-------------|---------|--------------|------------------|------------------|
| 1  | 132530600300518483 | 117°7'11" | 34°12'50" | 4.70×4.34   | 5.5×5.5 | 5000         | 1.34             | 2.88             |
| 2  | 132530600300518482 | 117°7'09" | 34°12'51" | 4.50×3.95   | 6.2×5.5 | 5178         | 1.67             | 3.14             |
| 3  | 132530600300518481 | 117°7'07" | 34°12'53" | 4.2×5.68    | 6.2×7.7 | 2500         | 1.47             | 3.59             |
| 4  | 132530600300518478 | 117°7'03" | 34°12'56" | 5.72        | 6       | 4444         | 1.5              | 2.52             |
| 5  | 132530600300518477 | 117°7'01" | 34°12'58" | 7.76        | 7.4     | 3056         | 1.25             | 2.59             |
| 6  | 132530600300518492 | 117°7'25" | 34°12'38" | 5.32        | 7.2     | 2678         | 1.49             | 2.97             |
| 7  | 132530600300518491 | 117°7'24" | 34°12'40" | 5           | 7.9     | 1389         | 0.57             | 1.45             |
| 8  | 132531100300317716 | 117°8'59" | 34°10'18" | 8.14        | 7       | 1667         | 1.41             | 2.12             |
| 9  | 132531100300317715 | 117°8'57" | 34°10'20" | 7.66        | 7.3     | 1389         | 1.43             | 2.67             |
| 10 | 132531100300317712 | 117°8'52" | 34°10'23" | 5.14×6.80   | 7.8×6.2 | 1111         | 0.8              | 1.48             |
| 11 | 132531100300317711 | 117°8'50" | 34°10'25" | 5.32        | 5.6     | 2222         | 1.17             | 2.24             |
| 12 | 132531100300317709 | 117°8'47" | 34°10'27" | 4.6         | 6       | 1333         | 0.47             | 1.01             |
| 13 | 132531100300317707 | 117°8'44" | 34°10'30" | 7.85        | 7.3     | 1556         | 0.97             | 1.83             |
| 14 | 132531100300317706 | 117°8'42" | 34°10'31" | 7.00        | 8.3     | 1222         | 1.65             | 2.71             |
| 15 | 132530800300323005 | 117°9'21" | 34°10'28" | 7.50×9.80   | 7.1×7.3 | 2356         | 1.25             | 2.18             |
| 16 | 132530800300322996 | 117°9'06" | 34°10'39" | 7.20×4.97   | 6.8×6.1 | 2089         | 1.19             | 2.38             |
| 17 | 132530800300322995 | 117°9'05" | 34°10'40" | 6.42×8.60   | 7.0×3   | 2222         | 1.75             | 3.34             |
| 18 | 132530800300322993 | 117°9'01" | 34°10'43" | 7.12×4.05   | 5.5×7.8 | 5556         | 1.88             | 4.12             |
| 19 | 27580300300316300  | 117°5'25" | 34°10'45" | 5.8         | 8.6     | 1389         | 0.75             | 1.27             |
| 20 | 27580300300316299  | 117°5'24" | 34°10'46" | 5.93        | 7.3     | 2222         | 0.97             | 2.48             |
| 21 | 27580300300316298  | 117°5'22" | 34°10'48" | 5.6         | 7.9     | 2222         | 0.93             | 2.01             |
| 22 | 27580300300316297  | 117°5'21" | 34°10'49" | 5.9         | 7.65    | 1389         | 1.2              | 3.17             |

**Table S3.** The relative importance of each factor for the absolute deviation of GEDI LAIe (referred to as LAIe deviation) and the difference between gap fraction derived from GEDI and NEON Lidar (referred to as DGF).

| Factors                           | Relative importance for absolute deviation of LAIe | Relative importance for DGF | Factors                                                      | Relative importance for absolute deviation of LAIe | Relative importance for DGF |
|-----------------------------------|----------------------------------------------------|-----------------------------|--------------------------------------------------------------|----------------------------------------------------|-----------------------------|
| DGF                               | 49.82                                              |                             | Slope (°)                                                    | 0.43                                               | 1.62                        |
| Forest types                      | 0.00                                               | 0.17                        | Standard deviation of slope                                  | 0.39                                               | 1.55                        |
| Canopy cover                      | 21.41                                              | 48.11                       | Sensitivity (0.9-1.0)                                        | 1.12                                               | 1.28                        |
| Mean height of trees (m)          | 0.00                                               | 11.47                       | Observation time (day and night)                             | 3.08                                               | 0.14                        |
| Standard deviation of tree height | 1.76                                               | 15.00                       | Beam type (power beam and coverage beam)                     | 0.08                                               | 0.32                        |
| Number of trees                   | 0.03                                               | 0.10                        | Modes in waveform (1-20)                                     | 2.10                                               | 1.68                        |
| Standard deviation of crown area  | 0.00                                               | 7.85                        | Point density of NEON Lidar (point/m2)                       | 1.90                                               | 2.50                        |
| Soil nitrogen content(g/kg)       | 0.00                                               | 5.09                        | Scan angle (°)                                               | 0.36                                               | 0.55                        |
| Soil organic content (kg/kg)      | 15.10                                              | 2.19                        | Difference of time between GEDI and NEON Lidar (Day of year) | 1.35                                               | 0.22                        |
| Soil pH                           | 1.07                                               | 0.14                        |                                                              |                                                    |                             |

**Table S4.** Path parameters in a structural equation model for GEDI LAIe deviation analysis. The estimate is the regression coefficient, Standardized estimate is the standardized estimate, S.E. is the approximate standard error, C.R. is the critical ratio, which is the ratio of the Standardized estimate to S.E., \*\*\* indicates that the independent variable has a significant effect on the dependent variable ( $p < 0.05$ ).

|                                                     | Estimate | Standardized estimate | S.E. | C.R.  | <i>p</i> |
|-----------------------------------------------------|----------|-----------------------|------|-------|----------|
| Gap difference → LAIe difference                    | 0.34     | 0.35                  | 0.07 | 5.18  | **<br>*  |
| Canopy crown area → gap difference                  | -0.20    | -0.21                 | 0.08 | -2.62 | **<br>*  |
| Soil SOC → gap difference                           | -0.18    | -0.17                 | 0.08 | -2.30 | **<br>*  |
| Soil SOC → LAIe difference                          | 0.32     | 0.33                  | 0.07 | 4.33  | **<br>*  |
| Canopy crown area → LAIe difference                 | 0.33     | 0.35                  | 0.07 | 4.50  | **<br>*  |
| Standard deviation of tree height → gap difference  | 0.48     | 0.46                  | 0.07 | 6.37  | **<br>*  |
| Standard deviation of tree height → LAIe difference | -0.24    | -0.25                 | 0.07 | -3.41 | **<br>*  |

The relationship between the absolute deviation of GEDI LAIe and factors was analyzed (Figure C1). Results showed that the absolute Bias of GEDI LAIe increased with the increase of DGF, canopy cover, mean height of trees, topographic slope, Standard deviation of the slope, nitrogen content, organic matter content, sensitivity, point density, and scan angle. While, the absolute deviation of GEDI LAIe increased first and then decreased with the increase of the number of trees, Standard deviation of crown area, Difference of DOY between GEDI and NEON Lidar, pH, and Modes in the waveform. For those discontinuous factors, the absolute deviation of GEDI LAIe in broadleaf forests is higher than in coniferous and mixed forests. For GEDI LAIe estimation, the GEDI power beam was slightly better than the coverage beam, while the night observation was not prior to the day estimation. Even though having a relationship between the absolute deviation of GEDI LAIe and factors from characteristics of slope and sensor system parameters, the influence of these factors is ignored due to the low variation of the absolute deviation of GEDI LAIe ( $\Delta |Bias|$  less than  $0.85 \text{ m}^2/\text{m}^2$ ).

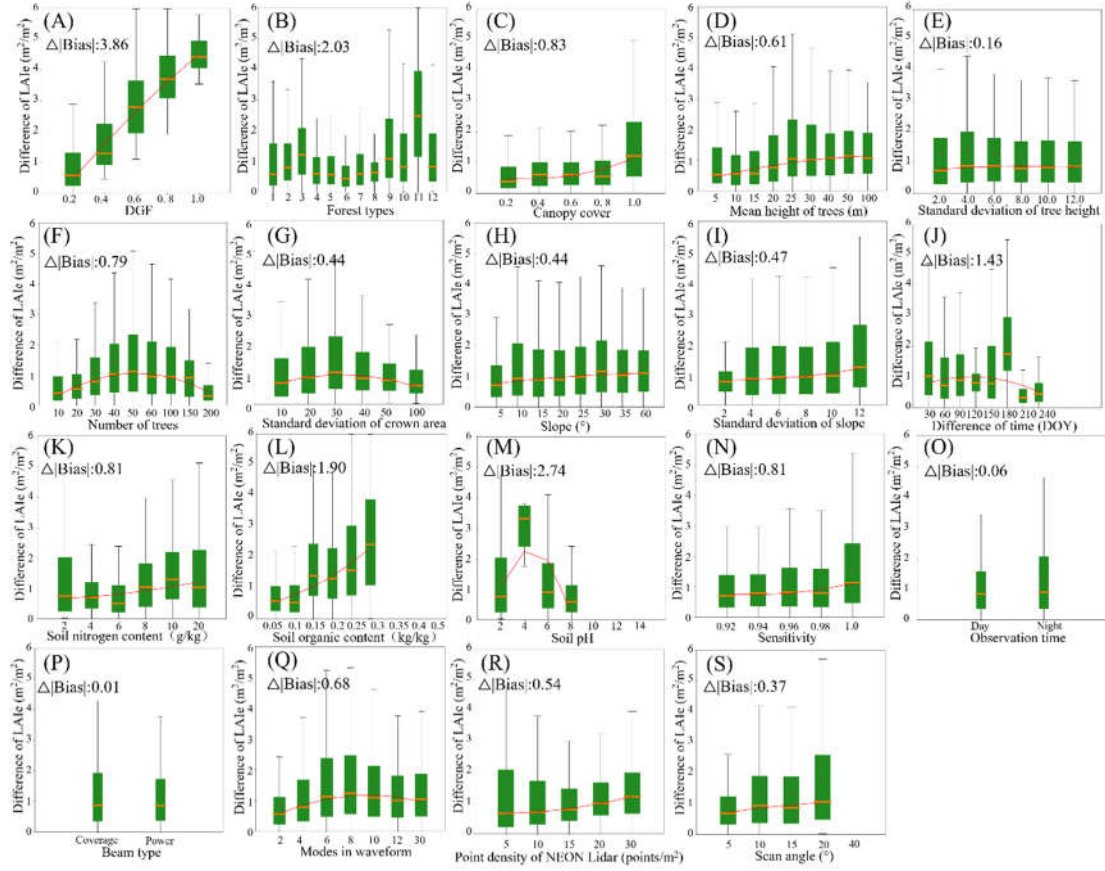

**Figure S2.** The relationship between the absolute deviation of GEDI LAle ( $|Bias|$ ) and factors. The  $\Delta|Bias|$  was the variation of the  $|Bias|$  along with the change of a factor which represented the influence degree of the factor on the  $|Bias|$ . The red line showed the fitting linear of median  $|Bias|$  and factors. The orange line was the value of the median for each bar. The (A–S) represent difference of gap fraction between GEDI and NEON Lidar, forest types, canopy cover, mean height of trees, standard deviation of tree height, number of trees, standard deviation of crown area, topographic slope, standard deviation of slope, difference of time between GEDI and NEON Lidar (Day of year), soil nitrogen content (g/kg), soil organic content (kg/kg), soil pH, sensitivity, observation time, beam type, modes in waveform, point density of NEON Lidar, and Scan angle.

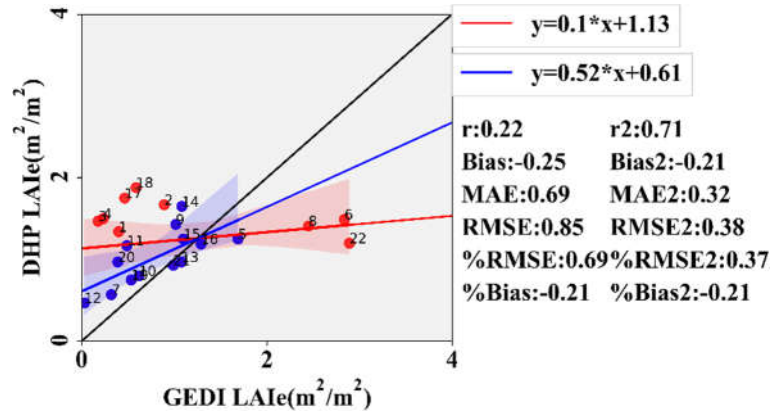

**Figure S3.** Accuracy comparison of GEDI LAIe between before and after filtering outliers when compared to field-measured LAIe based on Digital Hemispherical Photography imagery. The point number is identification of field survey plot. The n is number of samples. The r and r², Bias and Bias², MAE and MAE², RMSE and RMSE², %RMSE and %RMSE², %Bias and %Bias² are accuracy metrics for before and after filtering outliers, respectively.



**Table S5.** Examples of forest landscape for GEDI footprint to conduct field survey and the corresponding GEDI waveform. The yellow pin represents the GEDI footprint center, the scale displays a range of 40 m with center of GEDI footprint, the number shows the point ID, and the images were collected from Google earth engine collected in 04/2019 and 09/2020.

| Plot ID | 04/2019                                                                             | 09/2020                                                                             | Waveform                                                                              |
|---------|-------------------------------------------------------------------------------------|-------------------------------------------------------------------------------------|---------------------------------------------------------------------------------------|
| 1       |    |    |    |
| 6       |    |    |   |
| 8       |  |  |   |
| 18      |  |  |  |
